# Supplementary material
Source: MDPI journal article supplement (https://www.mdpi.com/2311-5637/7/3/124)
Supplement: s1 [file s1]

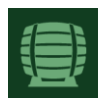

## Supplementary Materials: Growth of non-*Saccharomyces* native strains under different fermentative stress conditions

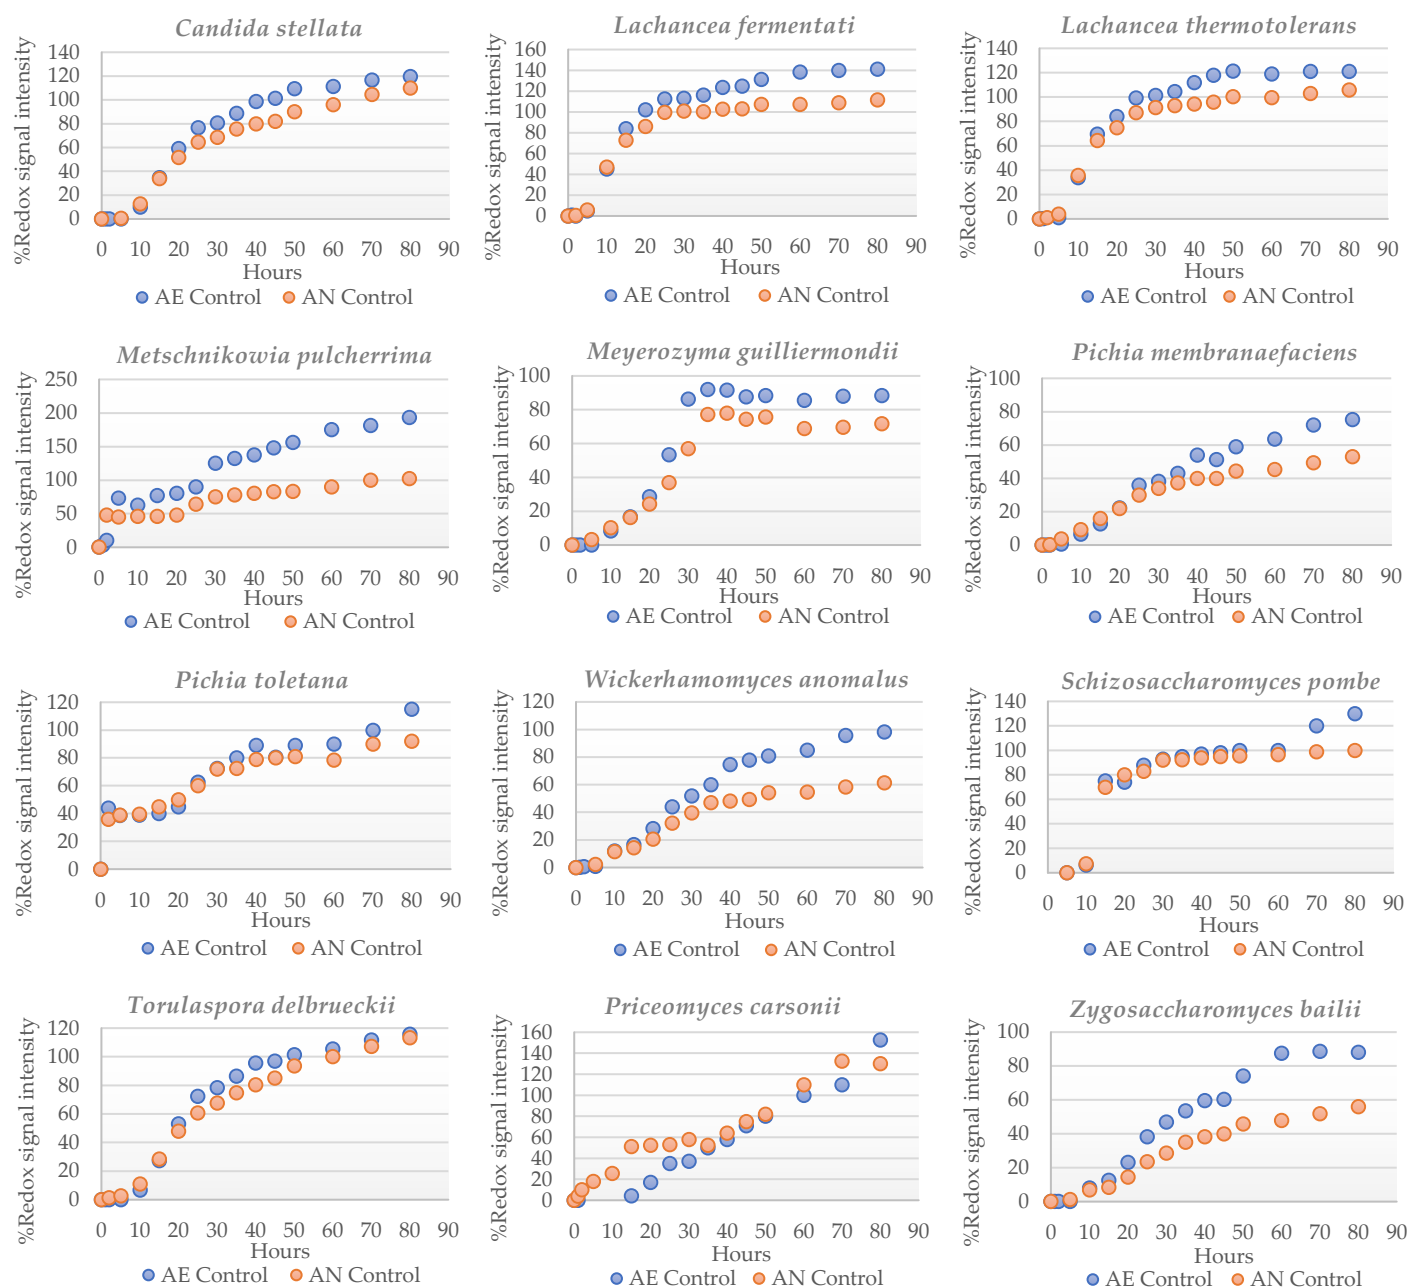

**Figure S1.** Phenotypic microarray analysis (% of redox signal intensity) of non-*Saccharomyces* strains in aerobic (AE) and anaerobic (AN) condition after 96 hours in YNB medium.
